# Supplementary material for: Photocatalytic activity of undoped and Mn- and Co-doped TiO2 nanocrystals incorporated in enamel coatings on stainless steel
Source: Royal Society of Chemistry journal article supplement (doi:10.1039/d1re00293g), 2021-01-01
Supplement: d1re00293g1.pdf [file d1re00293g1.pdf]

## ELECTRONIC SUPPLEMENTARY INFORMATION

### Photocatalytic activity of undoped and Mn- and Co-doped TiO<sub>2</sub> nanocrystals incorporated in enamel coatings on stainless steel

Andrea Diego-Rucabado,<sup>ab</sup> Marina T. Candela,<sup>bc</sup> Fernando Aguado,<sup>bc</sup> Jesús González,<sup>bc</sup>  
Eugenio Gómez,<sup>d</sup> Rafael Valiente,<sup>ab</sup> Israel Cano\*<sup>ae</sup> and Rosa Martín-Rodríguez\*<sup>bf</sup>

<sup>a</sup>Applied Physics Department, University of Cantabria, Avda. de Los Castros 48, 39005 Santander,  
Spain

<sup>b</sup>Nanomedicine Group, IDIVAL, Avda. Cardenal Herrera Oria s/n, 39011 Santander, Spain

<sup>c</sup>CITIMAC Department, University of Cantabria, Avda. de Los Castros 48, 39005 Santander, Spain

<sup>d</sup>VITRISPAN S.A., Barrio Rioseco, 39786 Guriezo, Spain

<sup>e</sup>Crystallography, Mineralogy and Agricultural Chemistry Department. Faculty of Chemistry,  
University of Seville, 41012 Seville, Spain

<sup>f</sup>QUIPRE Department, University of Cantabria, Avda. de Los Castros 46, 39005 Santander, Spain

#### Contents

|                                                                                                               |    |
|---------------------------------------------------------------------------------------------------------------|----|
| 1. X-ray diffraction analyses of TiO <sub>2</sub> NCs.....                                                    | S2 |
| 2. TEM images of TiO <sub>2</sub> NCs.....                                                                    | S3 |
| 3. Photographs of supported photocatalysts.....                                                               | S5 |
| 4. X-ray diffraction analyses of TiO <sub>2</sub> NCs deposited on enamel supported onto<br>steel sheets..... | S6 |
| 5. Recycling experiments.....                                                                                 | S7 |

## 1. X-ray diffraction analyses of TiO<sub>2</sub> NCs

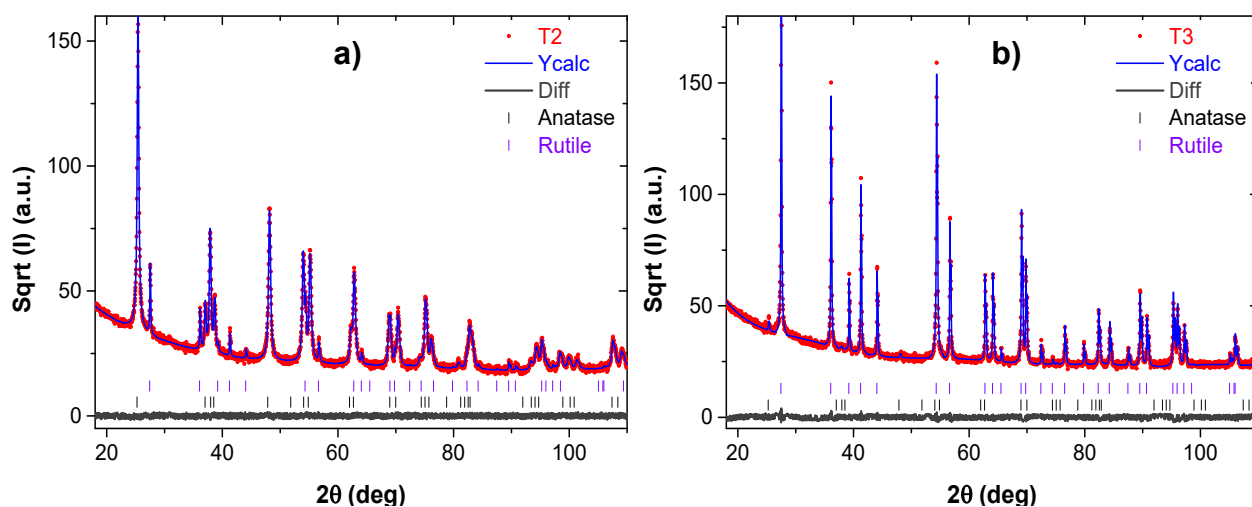

**Fig. S1** XRD diffraction patterns of (a) pure TiO<sub>2</sub> NCs calcined at 600 °C (T2); (b) pure TiO<sub>2</sub> NCs calcined at 800 °C (T3).

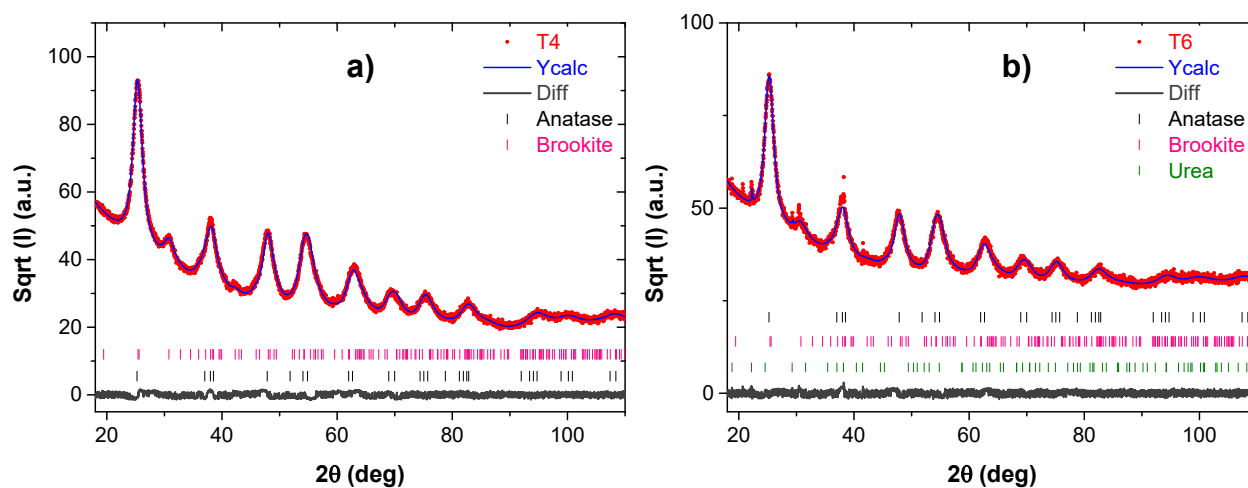

**Fig. S2** XRD diffraction patterns of (a) non-calcined Mn-doped TiO<sub>2</sub> NCs (T4); (b) non-calcined Co-doped TiO<sub>2</sub> NCs (T6).

## 2. TEM images of TiO<sub>2</sub> NCs

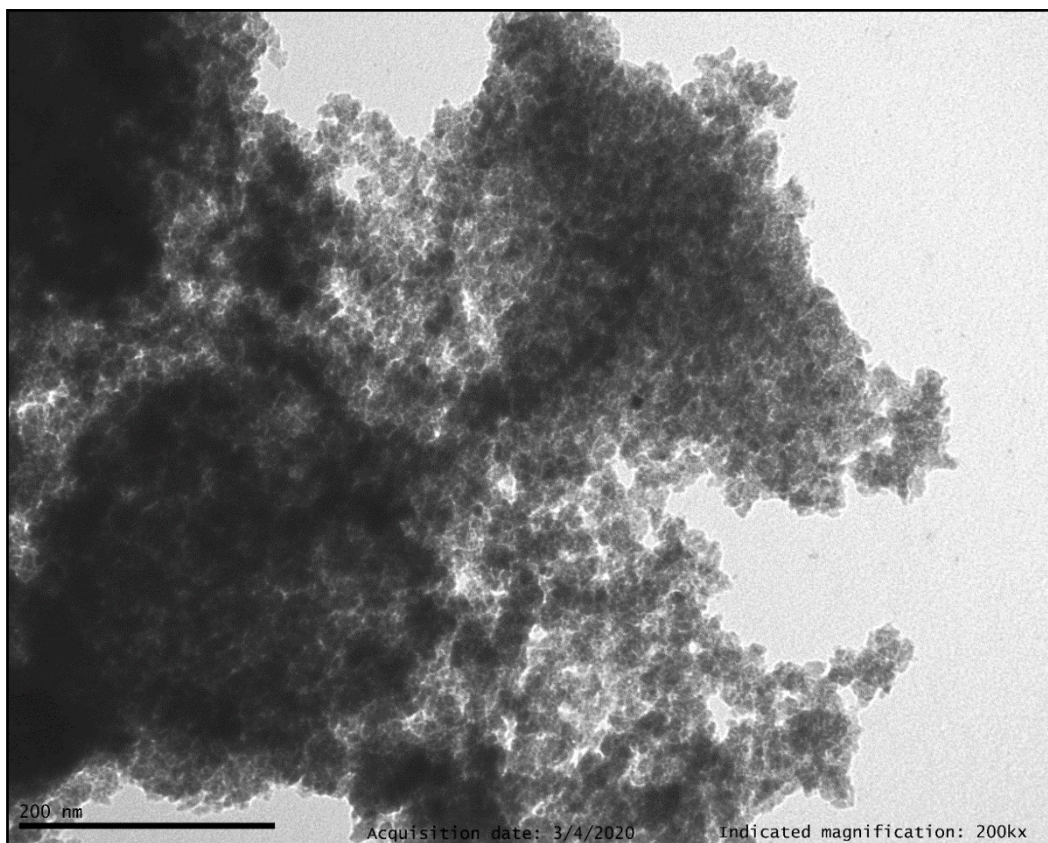

**Fig. S3** TEM image of T4.

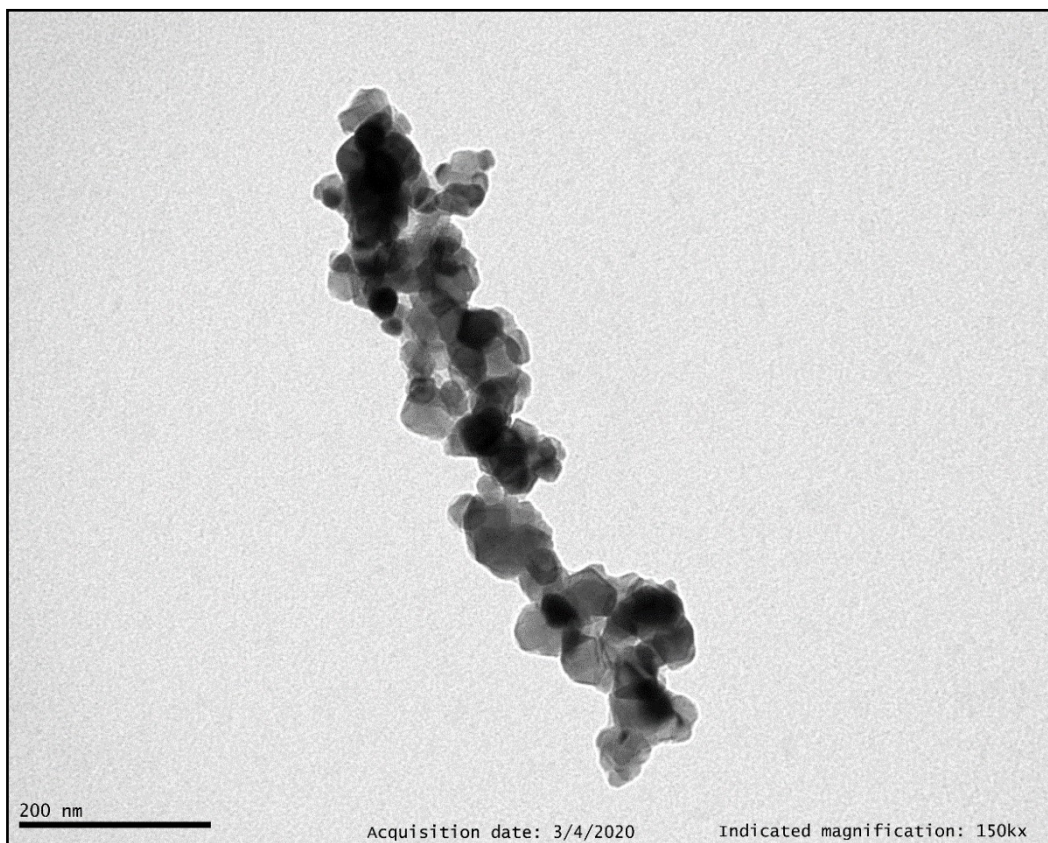

**Fig. S4** TEM image of T5.

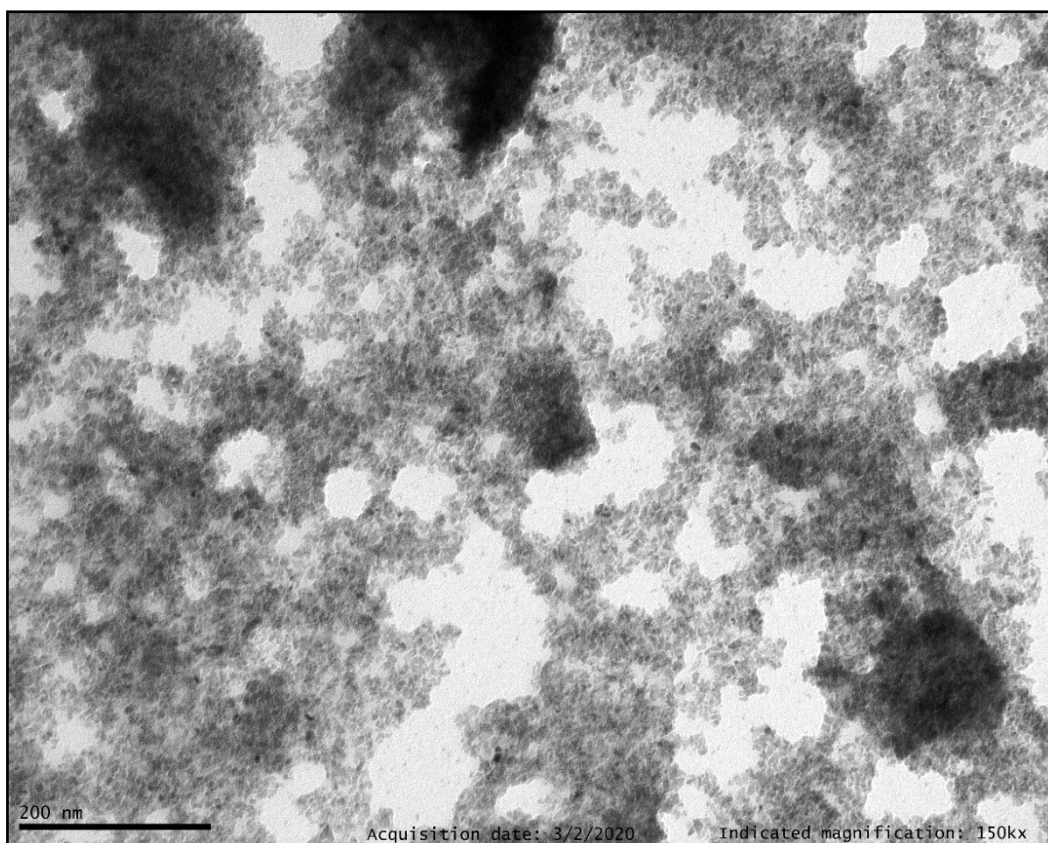

**Fig. S5** TEM image of T6.

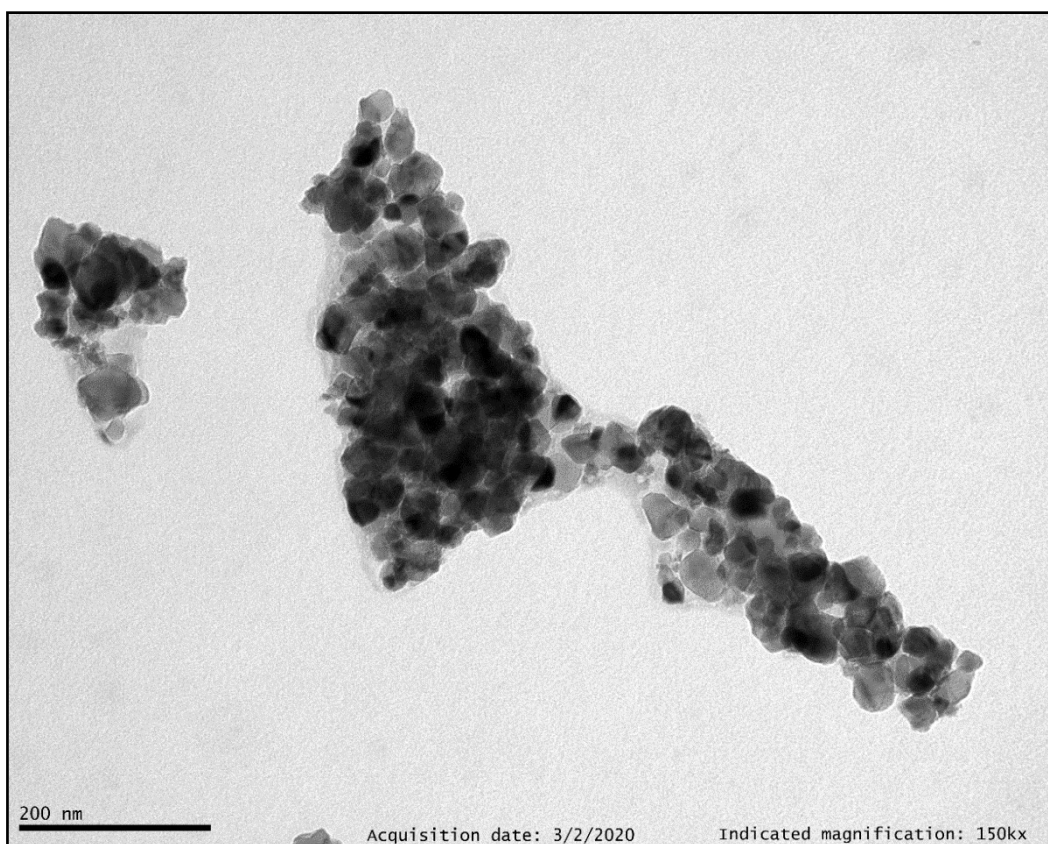

**Fig. S6** TEM image of T7.



### 3. Photographs of supported photocatalysts

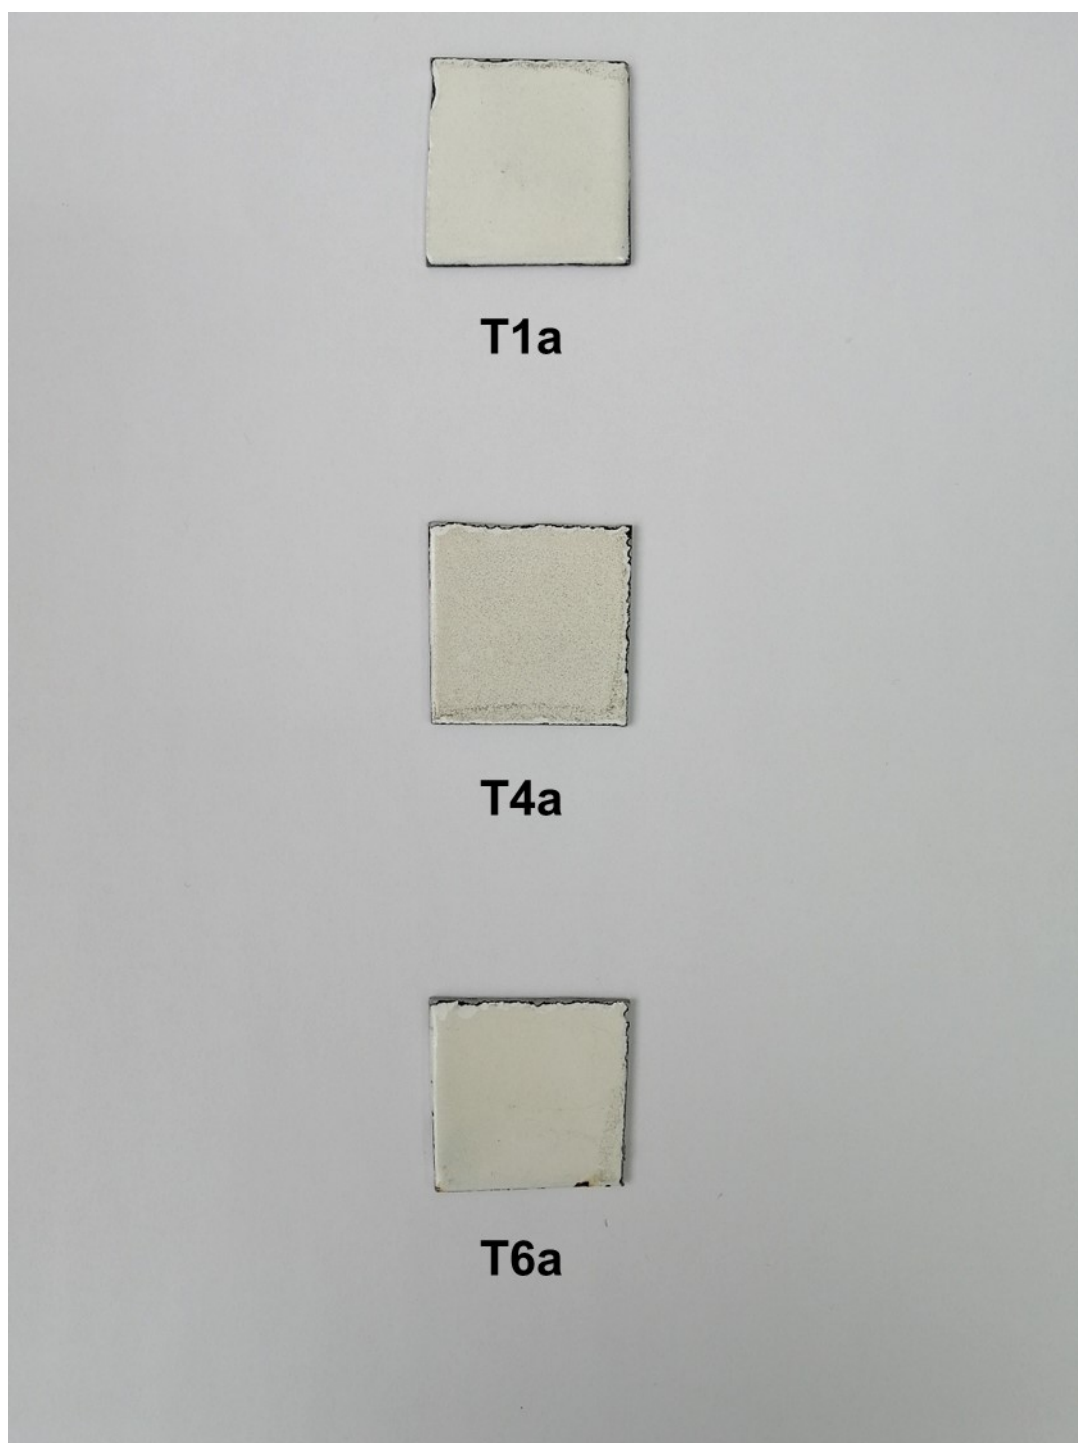

**Fig. S7** Photographs of supported photocatalysts containing TiO<sub>2</sub> NCs. T1a: pure TiO<sub>2</sub> NCs; T4a: Mn-doped TiO<sub>2</sub> NCs; T6a: Co-doped TiO<sub>2</sub> NCs.

#### 4. X-ray diffraction analyses of TiO<sub>2</sub> NCs deposited on enamel supported onto steel sheets

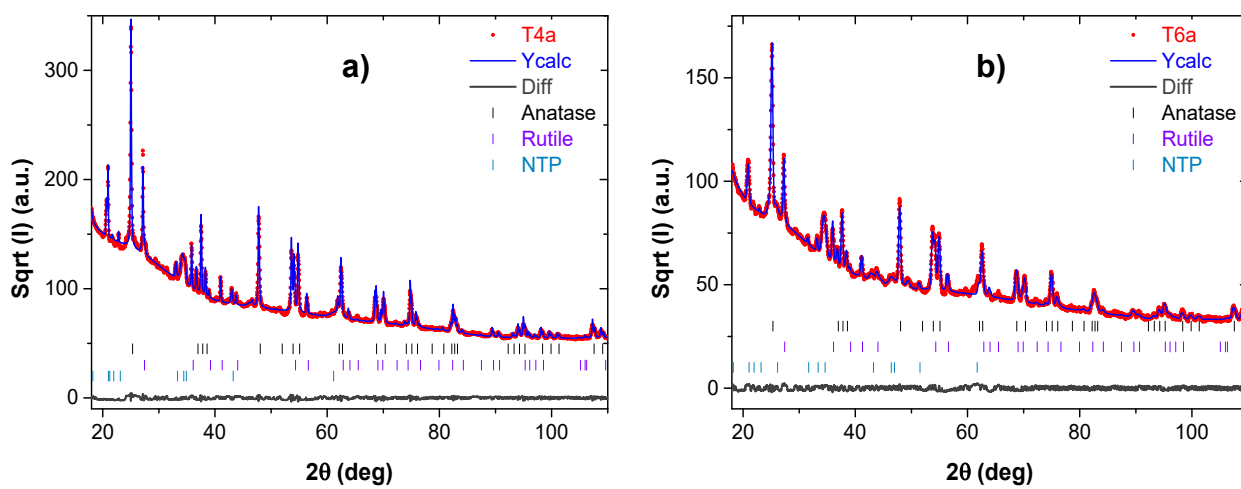

**Fig. S8** XRD diffraction patterns of (a) Mn-doped TiO<sub>2</sub> NCs deposited on enamel supported onto steel sheets (T4a). (b) Co-doped TiO<sub>2</sub> NCs deposited on enamel supported onto steel sheets (T6a).

## 5. Recycling experiments

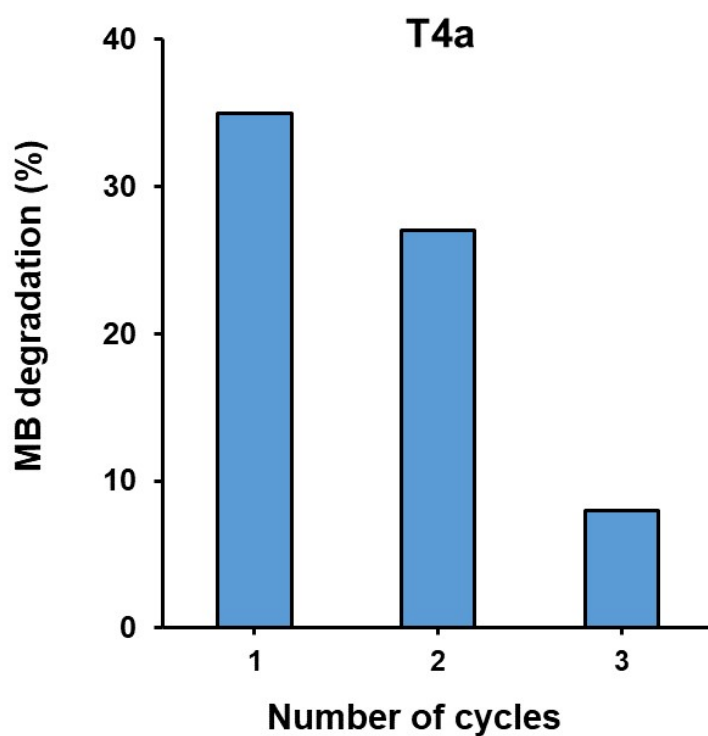

**Fig. S9** Reuse of T4a in the degradation of MB. Conditions: MB (150 mL, 10  $\mu$ M), catalyst (5 x 5  $\text{cm}^2$ ), 22 W,  $\lambda = 395$  nm, at RT.

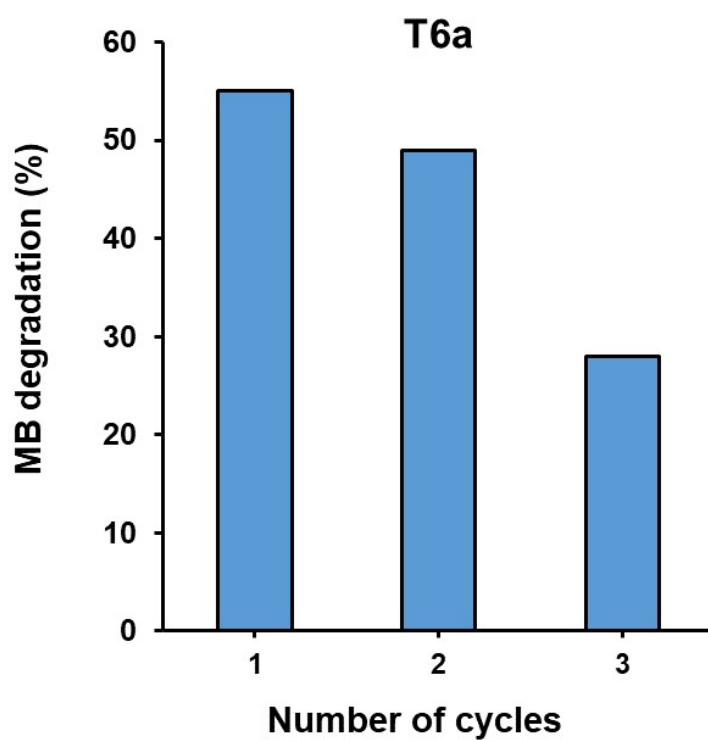

**Fig. S10** Reuse of T6a in the degradation of MB. Conditions: MB (150 mL, 10  $\mu$ M), catalyst (5 x 5  $\text{cm}^2$ ), 22 W,  $\lambda = 395$  nm, at RT.
